# Supplementary material for: Fat-induced membrane cholesterol accrual provokes cortical filamentous actin destabilisation and glucose transport dysfunction in skeletal muscle
Source: Springer Nature journal article supplement (doi:10.1007/s00125-011-2334-y), 2011-10-14
Supplement: MOESM1 [file 8090388]

1 **Electronic Supplementary Material**

2 **Supplemental Table I.** Sequences of primers used to quantify gene expression.

| Gene Designation | Gene Name                                | Forward Primer (5'→3')   | Reverse Primer (5'→3')  |
|------------------|------------------------------------------|--------------------------|-------------------------|
| <i>Acaca</i>     | Acetyl-CoA carboxylase                   | tacaacgcagggcatcagaag    | tgtgctgcaggaagattgac    |
| <i>Fasn</i>      | Fatty acid synthase                      | agggacaggtgtcttggtg      | gctcagggcagaggttacag    |
| <i>Gapdh</i>     | Glyceraldehyde 3-phosphate dehydrogenase | atggccagcctcgtagaccaaata | aagtgggccccggccttctccat |
| <i>Hmgcr</i>     | HMG-CoA reductase                        | tgtgggaacggtgacactta     | ctcaaatttgggcactca      |
| <i>Hmgcs1</i>    | HMG-CoA synthase                         | ctctgcctgactgtgttca      | cctcaaacagctgcatcaaa    |

3
