# Supplementary figures and images for: Fat-induced membrane cholesterol accrual provokes cortical filamentous actin destabilisation and glucose transport dysfunction in skeletal muscle
Source: Springer Nature journal article supplement (doi:10.1007/s00125-011-2334-y), 2011-10-14

**ESM Fig. 1**

Propidium iodide-stained L6 myotubes

0.0 mM  $\beta$ CD

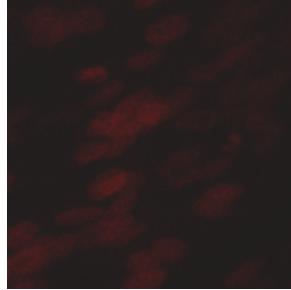

0.1 mM  $\beta$ CD

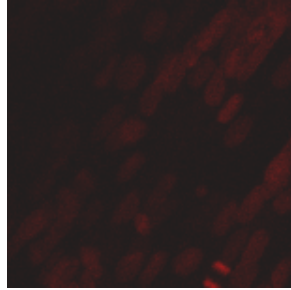

1.0 mM  $\beta$ CD

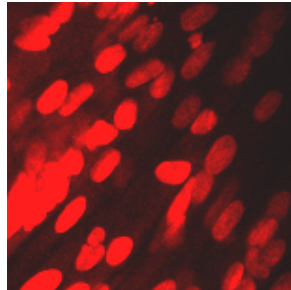

10.0 mM  $\beta$ CD

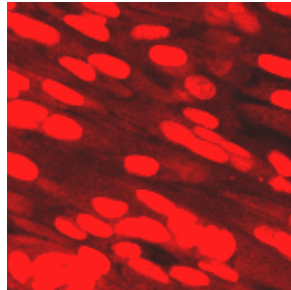

Supplement: MOESM2 [file 8090388]

**ESM Fig. 2**

**a**

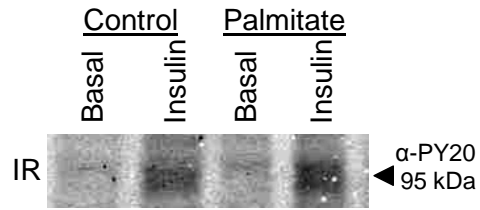

**b**

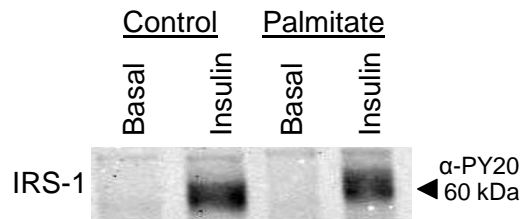

**c**

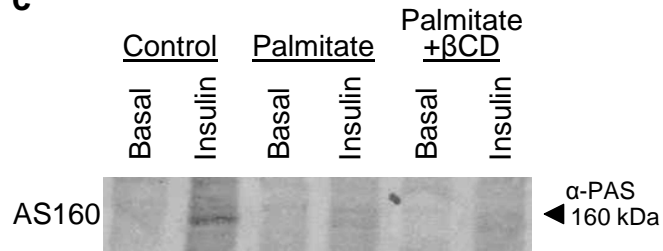

**d**

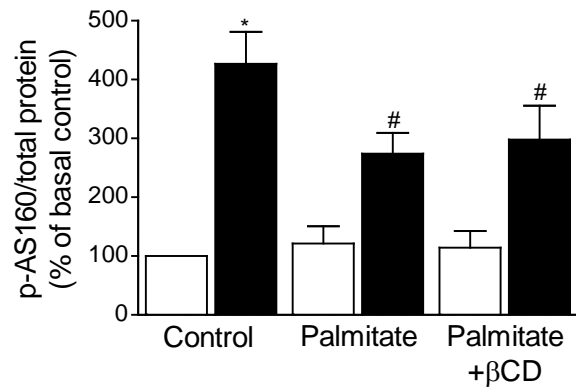

Supplement: MOESM3 [file 8090388]

### ESM Fig. 3

**a**

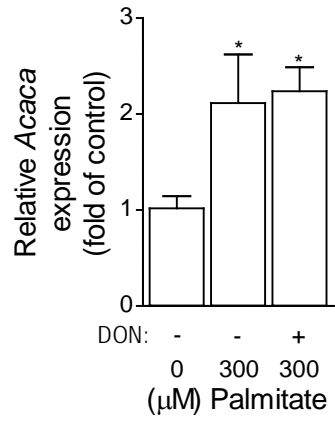

**b**

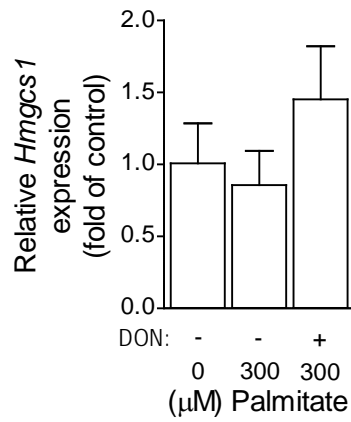

**c**

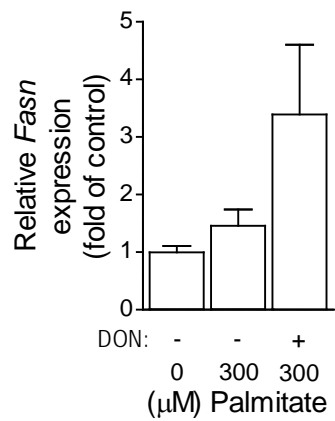

Supplement: MOESM4 [file 8090388]
